## Fluid flows and forces in development: functions, features and biophysical principles

Jonathan B. Freund, Jacky G. Goetz, Kent L. Hill and Julien Vermot

There was an error published in *Development* **139**, 1229-1245.

In the legend to Fig. 4 (p. 1235), it should read: 'While both flows are mainly directed from right to left (red arrows) with laminar flow features, a **rightwards** recirculatory flow (broken red arrows) is also generated.'

On p. 1236, it should read: 'For example, flow in the LR organizer of zebrafish rotates **counter-clockwise** (Kramer-Zucker et al., 2005) so that cells on the left side of the organizer experience a flow that goes from **anterior to posterior on the left side when imaged dorsally**; this is the opposite...'

The authors apologise to readers for this mistake.
